# Supplementary material
Source: publisher site journal article supplement (http://www.spandidos-publications.com/2552/downloadSupplementary)
Supplement: Supplementary file 1 [file downloadSupplementary]

Figure S1. Representative images of wells of the proliferation assay following single (SK-N-BE(2)-C cells: Fig. 7A and G; SK-N-SH cells: Fig. 7D and J and combined SK-N-BE(2)-C cells: Fig. 8A, D and G; SK-N-SH: Fig. 8J, M and P) treatment at 48 h with the PI3K and FGFR inhibitors. Images A and L show the growth of the SK-N-BE(2)-C and SK-N-SH cell lines without any drug treatment. The effects of 3 BYL and JNJ concentrations (a high and a low) are shown: BYL 0.5  $\mu$ M (B and M) and 10  $\mu$ M (C and N) and JNJ 0.01  $\mu$ M (D and O) and 10  $\mu$ M (E and P) on SK-N-BE(2)-C cell line and on SK-N-SH cells, respectively. The combinational effects are shown: for BYL-JNJ (F and I for SK-N-BE(2)-C cells, and Q and T for SK-N-SH cells), BEZ-JNJ (G and J for SK-N-BE(2)-C cells, and R and U for SK-N-SH and) and for BYL-AZD (H and K for SK-N-BE(2)-C cells, and S and V for SK-N-SH cells). BYL, BYL719; JNJ, JNJ-42756493; BEZ, BEZ235; AZD, AZD4547.

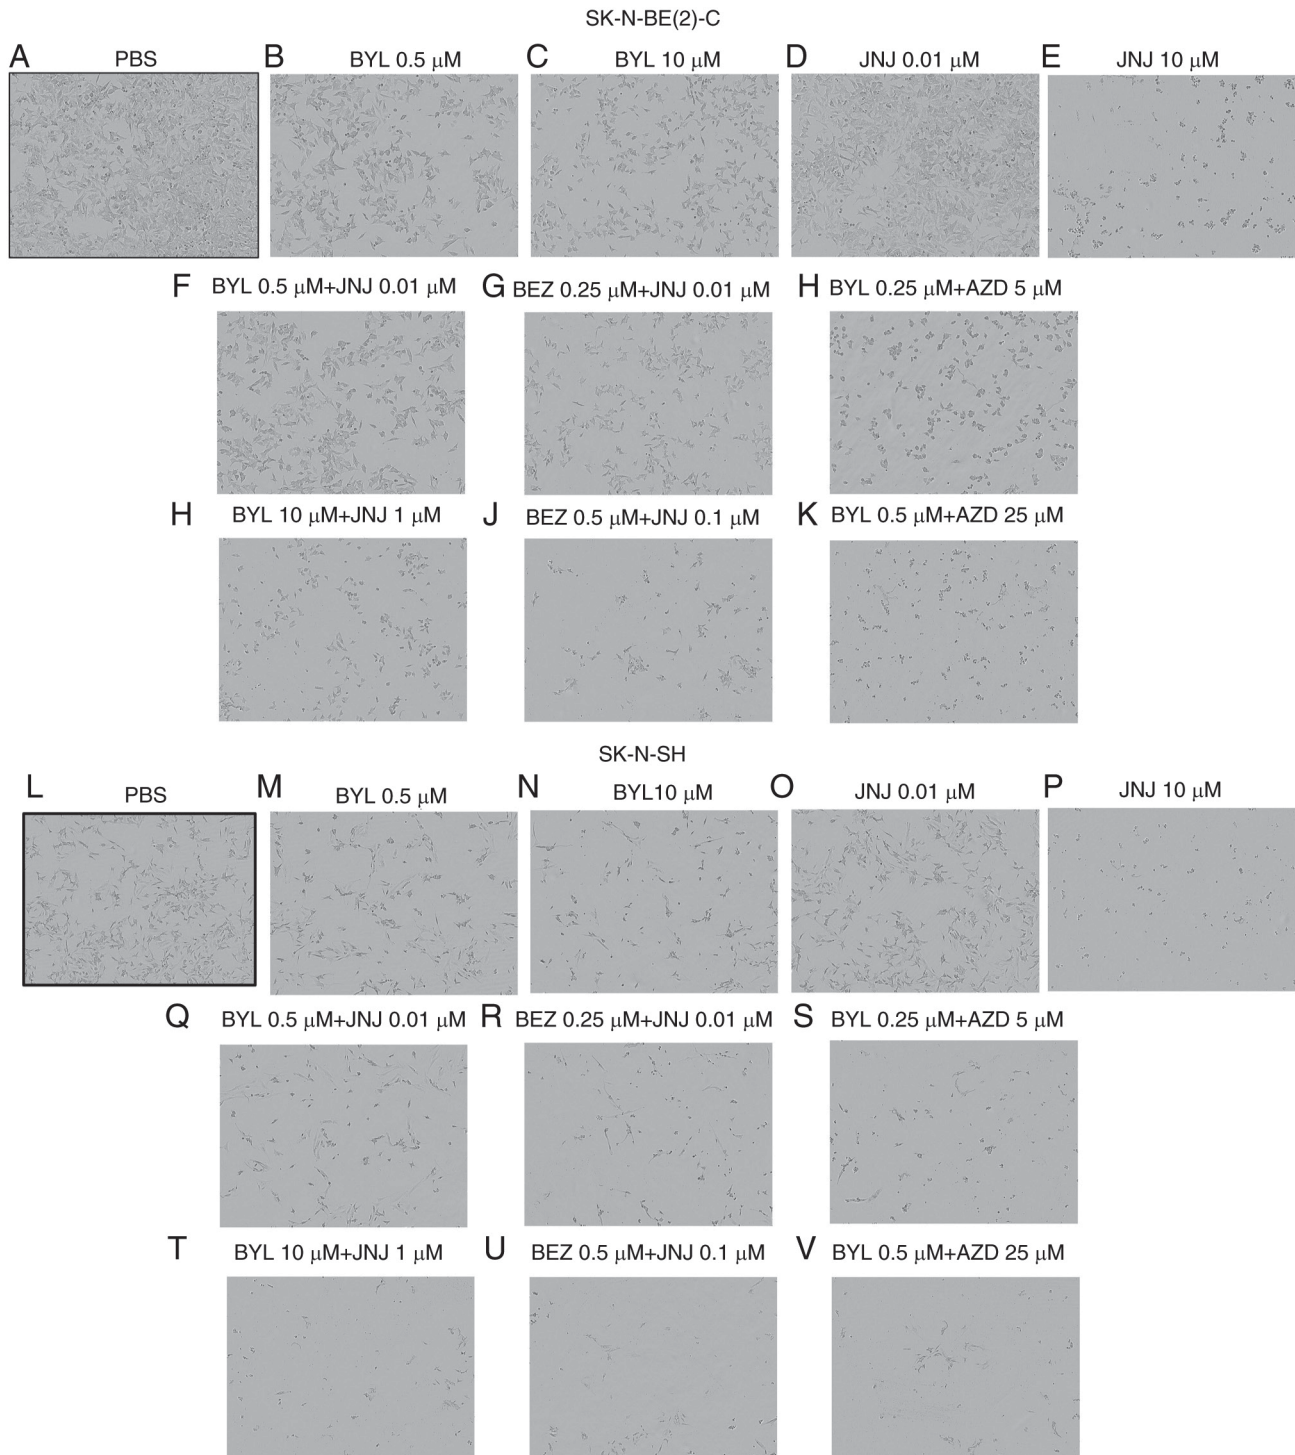

Figure S2. Representative images of wells of the proliferation assay after the single treatment with cisplatin (SK-N-BE(2)-C cells: Fig. 9A; SK-N-SH cells: Fig. 9D), vincristine (SK-N-BE(2)-C cells: Fig. 9G; SK-N-SH cells: Fig. 9J), doxorubicin (SK-N-BE(2)-C cells: Fig. 9M; SK-N-SH cells: Fig. 9P) at 48 h. Images A and H show the growth of the SK-N-BE(2)-C and SK-N-SH cell lines without any drug treatment. The effects of 2 vincristine, doxorubicin and cisplatin concentrations (a high and a low) are shown: For vincristine in images B and E for SK-N-BE(2)-C cells, and I and L for SK-N-SH cells, for doxorubicin in C and F (SK-N-BE(2)-C), and J and M (SK-N-SH cells), and for cisplatin in D and G (SK-N-BE(2)-C cells), and K and N (SK-N-SH cells). CIS, cisplatin; VIN, vincristine; DOXO, doxorubicin.

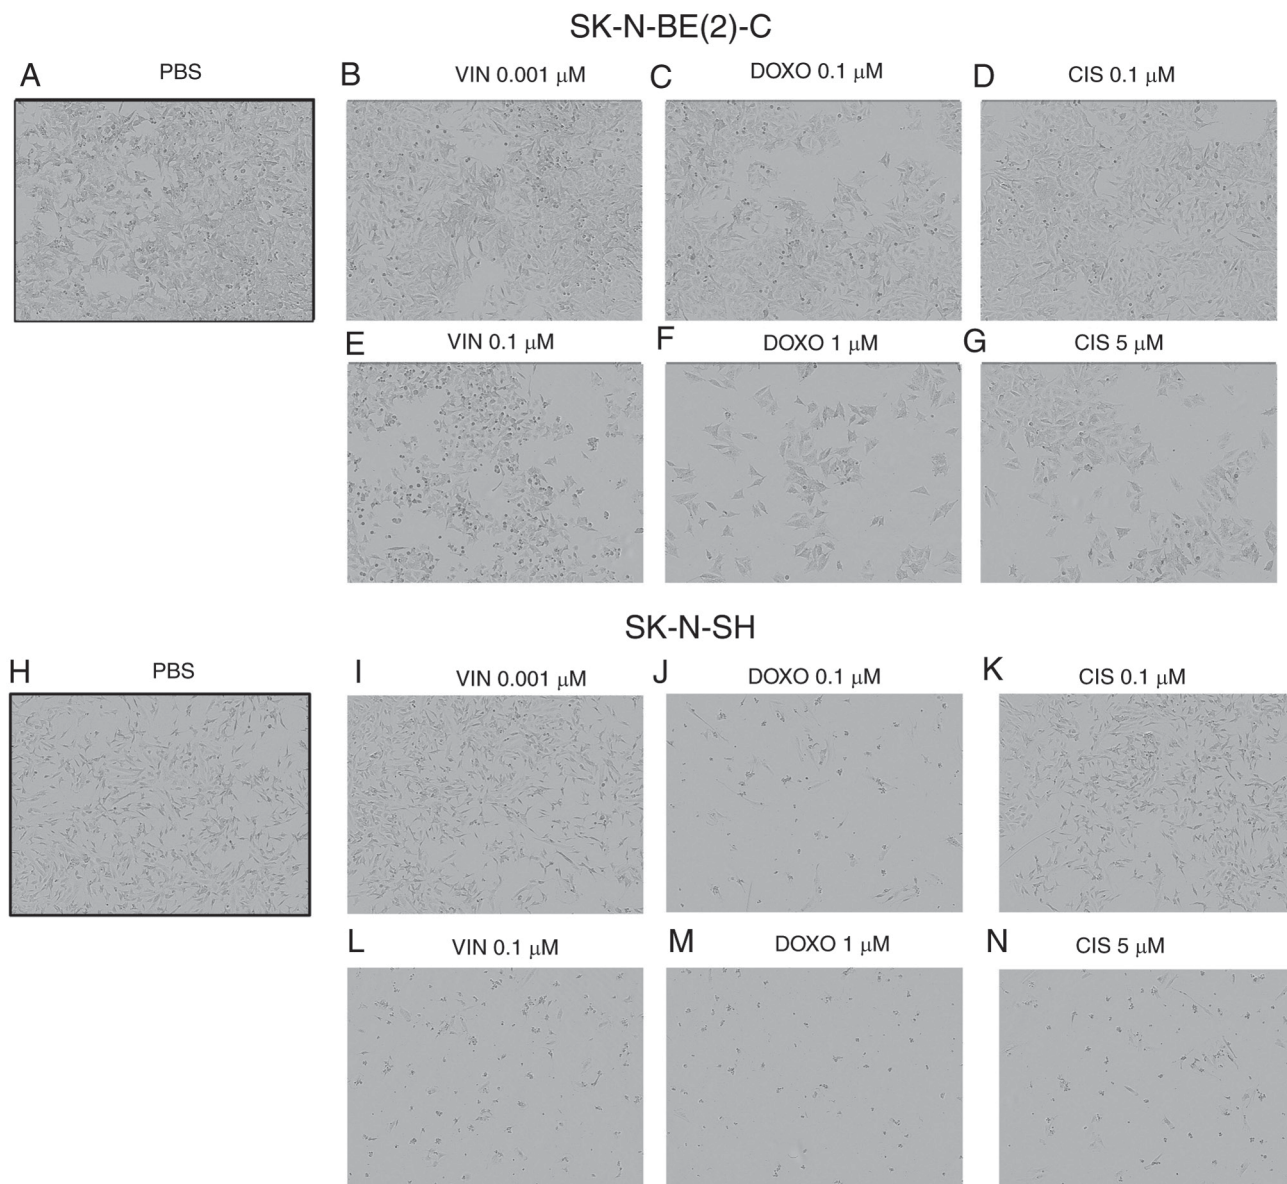

Table SI. p53 and NMYC status of the neuroblastoma cell lines.

| Cell line    | Origin                                                                                                     | NMYC status | p53 status |
|--------------|------------------------------------------------------------------------------------------------------------|-------------|------------|
| SK-N-AS      | Established from a bone marrow metastasis from a female suffering with neuroblastoma.                      | Non Amp     | mut        |
| SK-N-BE(2)-C | Established from a bone marrow biopsy of a 22-month-old male with disseminated neuroblastoma in 1972.      | Amp         | mut        |
| SK-N-DZ      | Spontaneously transformed cells from a female patient with neuroblastoma.                                  | Amp         | mut        |
| SK-N-FI      | SK-N-FI has been obtained from a bone marrow metastasis of a male patient with neuroblastoma.              | Non Amp     | mut        |
| SK-N-SH      | Established from a bone marrow metastasis from a 4-year-old caucasian female suffering with neuroblastoma. | Non Amp     | wt         |

NA, non-amplified; wt, wild-type; mut, mutant.
